1                   **The role of isoforms in the evolution of cryptic coloration in *Peromyscus* mice**

2

3 Ricardo Mallarino<sup>1\*</sup>, Tess A. Linden<sup>1\*</sup>, Catherine R. Linnen<sup>2</sup>, and Hopi E. Hoekstra<sup>1§</sup>

4

5 <sup>1</sup>Departments of Organismic & Evolutionary Biology and Molecular & Cellular Biology,

6       Museum of Comparative Zoology, Howard Hughes Medical Institute, Harvard University, 26

7       Oxford Street, Cambridge MA 02138 USA

8 <sup>2</sup>Department of Biology, University of Kentucky, 675 Rose Street, Lexington, KY 40506 USA

9

10 \* Equal contribution

11 § Author for correspondence: [hoekstra@oeb.harvard.edu](mailto:hoekstra@oeb.harvard.edu)

12

13

14

15

16

17

18

19

20

21

22

23 **Abstract**

24           A central goal of evolutionary biology is to understand the molecular mechanisms  
25 underlying phenotypic adaptation. While the contribution of protein-coding and *cis*-regulatory  
26 mutations to adaptive traits have been well documented, additional sources of variation—such as  
27 the production of alternative RNA transcripts from a single gene, or isoforms—have been  
28 understudied. Here, we focus on the pigmentation gene *Agouti*, known to express multiple  
29 alternative transcripts, to investigate the role of isoform usage in the evolution of cryptic color  
30 phenotypes in deer mice (genus *Peromyscus*). We first characterize the *Agouti* isoforms  
31 expressed in the *Peromyscus* skin and find two novel isoforms not previously identified in *Mus*.  
32 Next, we show that a locally adapted light-colored population of *P. maniculatus* living on the  
33 Nebraska Sand Hills shows an up-regulation of a single *Agouti* isoform, termed 1C, compared to  
34 their ancestral dark-colored conspecifics. Using *in vitro* assays, we show that this preference for  
35 isoform 1C may be driven by isoform-specific differences in translation. In addition, using an  
36 admixed population of wild-caught mice, we find that variation in overall *Agouti* expression  
37 maps to a region near exon 1C, which also has patterns of nucleotide variation consistent with  
38 strong positive selection. Finally, we show that the independent evolution of cryptic light  
39 pigmentation in a different species, *P. polionotus*, has been driven by a preference for the same  
40 *Agouti* isoform. Together, these findings present an example of the role of alternative transcript  
41 processing in adaptation and demonstrate molecular convergence at the level of isoform  
42 regulation.

43

44

45

## 46 **Introduction**

47           Understanding the molecular basis of adaptation is one of the principal goals of  
48 evolutionary biology. Considerable efforts have been focused on the contributions of protein-  
49 coding and *cis*-regulatory mutations, and their relative importance, to phenotypic change (Carroll  
50 2005; Hoekstra & Coyne 2007; Stern & Orgogozo 2008). In contrast, the production of multiple  
51 isoforms through the inclusion of different exons in mRNA—known as alternative mRNA  
52 processing—is a major source of genetic variation whose role in phenotypic adaptation has been  
53 comparatively understudied. A single protein-coding gene can produce multiple isoforms either  
54 through alternative splicing, which results in transcripts with different combinations of exons, or  
55 through the use of alternative transcription initiation or termination sites, which generate mRNAs  
56 that differ at the 5' or 3' untranslated regions (UTRs). Alternative processing is ubiquitous  
57 throughout eukaryotic evolution but is most prevalent in higher eukaryotes, with mammals  
58 having the highest genome-wide rate of alternative splicing events (Barbosa-Morais *et al.* 2012;  
59 Merkin *et al.* 2012) and alternative promoter usage (Landry *et al.* 2003; Baek *et al.* 2007;  
60 Shabalina *et al.* 2014). In addition, recent studies of mammalian gene expression show that  
61 transcripts from the majority of protein-coding genes, especially in primates, undergo alternative  
62 processing and generate different isoforms (Blencowe 2006; Kim *et al.* 2008). Thus, by  
63 increasing transcriptomic, and hence proteomic diversity, the production of multiple isoforms  
64 through alternative processing has been widely regarded as a key mechanism for generating  
65 phenotypic diversity and organismic complexity, particularly at large taxonomic scales (Barbosa-  
66 Morais *et al.* 2012; Merkin *et al.* 2012).

67           To investigate the role of alternative processing in adaptation between closely related  
68 species, we studied the pigmentation locus *Agouti*, which has been used as a model for isoform

69 regulation in development (Vrieling *et al.* 1994) and has been repeatedly implicated in the  
70 evolution of natural variation in pigmentation (e.g., Rieder *et al.* 2001; Schmutz & Berryere  
71 2007; Seo *et al.* 2007; Steiner *et al.* 2007; Linnen *et al.* 2009, 2013). *Agouti* encodes a secreted  
72 paracrine factor that induces pigment-producing cells (melanocytes) in hair follicles to switch  
73 from the synthesis of black pigment (eumelanin) to yellow pigment (phaeomelanin) during hair  
74 growth (Jackson 1994). Experiments performed in laboratory mouse (*Mus musculus*) neonates  
75 found that the *Agouti* locus comprises three constitutively transcribed coding exons and four  
76 upstream, alternatively transcribed 5' UTRs, also called non-coding exons (Vrieling *et al.* 1994).  
77 Thus, in *M. musculus*, *Agouti* mRNAs are found as four different isoforms, each containing one  
78 to two non-coding exons upstream of the coding sequence. The “ventral-specific” non-coding  
79 exons 1A and 1A' are expressed in the ventral mesenchyme during embryonic development,  
80 whereas the “hair-cycle specific” non-coding exons 1B and 1C are expressed during hair growth  
81 across all regions of the body (Vrieling *et al.* 1994). Thus, alternative promoters of *Agouti* allow  
82 for differences in the spatial and temporal deployment of a single coding sequence.

83         Deer mice (genus *Peromyscus*) populations vary tremendously in both color and pattern.  
84 Across populations, there is often a close correspondence between the color of mouse fur and the  
85 local soil, suggesting that color-matching is important for survival (Dice 1940; 1941; Haldane  
86 1948). In both Nebraska and Florida, dark-colored mice have colonized extreme light substrate  
87 environments that appeared in the last 10,000 years— the Sand Hills in Nebraska (Ahlbrandt &  
88 Fryberger 1980; Loope & Swinehart 2000) and the coastal islands in Florida (Campbell 1985;  
89 Stapor & Mathews 1991). In both cases, mice have independently evolved significantly lighter  
90 coats than mice inhabiting darker surrounding substrates (Fig. 1A and 1B), and there is

91 experimental evidence that visually hunting predators generate strong selection favoring substrate  
92 matching (Dice 1941; Vignieri *et al.* 2010; Linnen *et al.* 2013).

93 In addition to phenotypic convergence, the same gene, *Agouti*, has been shown to play a  
94 significant role in mediating this color adaptation in both Nebraska and Florida populations  
95 (Steiner *et al.* 2007; Linnen *et al.* 2009; Manceau *et al.* 2011; Linnen *et al.* 2013). Specifically, in  
96 light-colored *P. maniculatus* inhabiting the Nebraska Sand Hills, referred to as “wideband” mice,  
97 *Agouti* is expressed at higher levels and for a longer period during hair growth than in their  
98 ancestral dark-colored counterparts (“wild-type” mice), which gives rise to a lighter and wider  
99 pheomelaninic band on individual hairs and overall lighter appearance (Linnen *et al.* 2009).  
100 Furthermore, wideband mice display marked differences in additional pigment traits (e.g., dorso-  
101 ventral boundary, ventral color, and tail stripe) that are significantly associated with variants in  
102 the *Agouti* locus (Linnen *et al.* 2013). In Florida, changes in *Agouti* and two other pigmentation  
103 loci are responsible for producing the lighter pigmentation phenotypes displayed by a derived  
104 population of beach mice (*P. polionotus leucocephalus*) inhabiting the coastal sand dunes,  
105 relative to their ancestral mainland conspecifics (*P. p. subgriseus*) (Hoekstra *et al.* 2006; Steiner  
106 *et al.* 2007; Mullen & Hoekstra 2008). Like wideband mice from the Nebraska Sand Hills,  
107 Florida beach mice express *Agouti* at higher levels and in extended spatial domains compared to  
108 mainland mice (Manceau *et al.* 2011).

109 The implication of *Agouti* in the repeated evolution of cryptic coloration in *Peromyscus*,  
110 coupled with its regulatory architecture of alternative 5’ non-coding exons expressed in a region-  
111 and temporal-specific pattern, make this an excellent system in which to study the role of isoform  
112 regulation in evolution and adaptation. Here, we first characterize the *Agouti* isoforms present in  
113 *Peromyscus* skin and examine their patterns of expression during hair growth. We then use *in*

114 *vitro* experiments to study transcript-specific functional differences. Next, we use a  
115 phenotypically variable population in the Sand Hills to map variation in overall *Agouti* mRNA  
116 expression to the *Agouti* locus and to test for signatures of selection on the different isoforms.  
117 Finally, we study the expression of *Agouti* isoforms in Florida *P. polionotus* to establish whether  
118 the changes in isoform regulation seen in Nebraska *P. maniculatus* are shared with its sister  
119 species that independently evolved light coloration as an adaptation to a similar light-colored  
120 sandy environment.

121

## 122 **Materials and Methods**

### 123 *Mice*

124 Lab mice strains: We originally acquired wild-derived strains from the *Peromyscus* Genetic  
125 Stock Center (University of South Carolina) and now maintain them at Harvard University. As  
126 representatives of the mice found in Nebraska, we used *P. maniculatus* wild-type ( $a^+/a^+$ ) and *P.*  
127 *maniculatus* heterozygous for the wideband allele and a non-agouti allele ( $a^{wb}/a^-$ ). The non-  
128 agouti allele has a 125-kb deletion that removes the entire regulatory region and first coding  
129 exon, resulting in a complete loss of expression (Kingsley *et al.* 2009); thus, *P. maniculatus*  
130  $a^{wb}/a^-$  are effectively hemizygous for the dominant wideband allele. For many of the experiments,  
131 however, we also generated wideband mice homozygous for the wideband allele ( $a^{wb}/a^{wb}$ ). As  
132 representatives of mice in Florida, we used *P. polionotus subgriseus* mainland mice and *P. p.*  
133 *leucocephalus* Santa Rosa Island beach mice. All experiments described here were evaluated and  
134 approved by Harvard University's IACUC committee and performed following their established  
135 guidelines and regulations.

136

137 Wild-caught mice: Mice used for the association and selection studies were collected as described  
138 in Linnen *et al.* (2009) from two Sand Hills sites located <15km apart in Cherry County,  
139 Nebraska (site 1: Schlagel Creek Wildlife Management Area, N=62; site 2: Ballard's Marsh  
140 Wildlife Management Area, N=29).

141

#### 142 *Quantification of phenotype and soil coloration*

143 We prepared flat skins of mice from the strains mentioned above using standard museum  
144 protocols, which were then deposited in the Mammal Department of the Museum of Comparative  
145 Zoology at Harvard University. For all the specimens, we quantified dorsal coloration using a  
146 USB4000 spectrophotometer and a PX-2 pulsed xenon light source, and recorded readings using  
147 the program SpectraSuite (Ocean Optics). Using a reflectance probe with a shield cut at a 45°  
148 angle (to minimize diffuse reflection), we took and averaged three measurements of the dorsal  
149 skin of each mouse. We trimmed the data to 300-700 nm range, which represents the visible  
150 spectrum of most visual predators (Bennet & Lamoreux 2003), and extracted seven color  
151 summary statistics using the program CLRvars (Montgomerie R, 2008, CLR, version 1.05;  
152 available at <http://post.queensu.ca/~mont/color/analyze.html>): B2 (mean brightness), B3  
153 (intensity), S3 (chroma), S5c (chroma), S6 (contrast, amplitude), H3 (hue), and H4c (hue). After  
154 performing a normal quantile transformation on each variable, we performed a principal  
155 components analysis (PCA) on the transformed data in R (R: A Language and Environment for  
156 Statistical Computing, R Core Team, 2014, <http://www.R-project.org/>) using prcomp.

157 To quantify variation in soil color, we collected soil samples from four different localities  
158 representing the natural habitats of the mice used in this study: Schlagel Creek Wildlife  
159 Management Area, Cherry County, Nebraska (*P. maniculatus* wideband mice); Sparks, Cherry

160 County, Nebraska (*P. maniculatus* wild-type mice); Santa Rosa Island, Okaloosa County, Florida  
161 (*P. p. leucocephalus* beach mice); and Graceville, Jackson County, Florida (*P. p. subgriseus*  
162 mainland mice). We quantified soil reflectance with a spectrophotometer as described above.

163

#### 164 *Rapid Amplification of cDNA Ends (RACE)*

165 We sampled dorsal and ventral skin of *P. maniculatus* wideband ( $a^{wb}/a^{-}$ ) and wild-type  
166 strains and used 5' rapid amplification of cDNA ends (RACE) to identify the *Agouti* isoforms  
167 present in *Peromyscus*. To explore and characterize the full diversity of *Agouti* isoforms, we  
168 sampled tissue from pups (postnatal day 4 [P4]), as previously done in *Mus* (Vrieling *et al.* 1994),  
169 and from adults (>30 days), since the pelage in adult *Peromyscus* differs from juveniles (Fig. S1,  
170 supporting information; Golley *et al.* 1966), and therefore may contain additional transcripts not  
171 found during the initial hair cycle.

172 For each mouse strain, we extracted RNA from skin taken from 1-4 individuals. We  
173 dissected skin immediately after sacrifice and stored it in RNAlater (Qiagen) at 4°C. We  
174 extracted total RNA using the Qiagen RNeasy Fibrous Tissue Kit. To maximize tissue disruption  
175 and RNA yield, we performed two 2-min homogenizations at 50Hz using a 5mm steel ball and a  
176 Tissuelyser LT (Qiagen). Following extraction, we quantified RNA using a Quant-it RNA kit and  
177 a Qubit fluorometer (Invitrogen). From total RNA, we then purified mRNA using NucleoTrap  
178 mRNA kits (Clontech) and quantified mRNA using fluorescence as described above.

179 Following mRNA purification, we used the SMARTer RACE cDNA Amplification Kit  
180 (Clontech) to prepare 5'-RACE ready cDNA and perform RACE PCRs. To increase the  
181 specificity of the 5' RACE PCRs, we performed a nested PCR. For the first RACE PCR, we used  
182 the kit-provided UPM primer in conjunction with a primer located in the exon 4 of *Agouti*



183 (“GSP1” sequence: GTTGAGTACGCGGCAGGAGCAGACG). For the nested PCR, we used  
184 the kit-provided NUPA primer in conjunction with a primer located upstream of GSP1  
185 (“NGSP1C”, sequence: TCTTCTTCAGTGCCACAATAGAAACAG). Following the second  
186 PCR, we gel-purified any obvious bands using a Qiaquick gel extraction kit (Qiagen). We then  
187 ligated the resulting DNA to vectors and transformed competent cells using the pGEMt easy  
188 Vector kit (Promega).

189       Following transformation, we performed colony PCRs using Qiagen TAQ and M13F and  
190 M13R primers. PCR products were purified enzymatically using Exonuclease I and Shrimp  
191 Alkaline Phosphatase (USB). Purified PCR products were sequenced on an ABI 3730xl Genetic  
192 Analyzer at Harvard University’s Genomics Core facility. In total, we obtained sequences from  
193 24-89 *Agouti* clones from each of eight distinct genotype/stage/tissue combinations. Then, all  
194 *Agouti* clones were sequenced using primers placed at the 5’ end and with *Agouti*-Exon3-R (see  
195 Supplementary Table 1) to confirm the presence of the *Agouti* coding sequence.

196

#### 197 *Quantitative PCR (qPCR)*

198 Lab strains: We performed gene expression analyses in *P. maniculatus* wideband ( $a^{wb}/a^{wb}$ ), *P.*  
199 *maniculatus* wild-type, *P. p. subgriseus*, and *P. p. leucocephalus* mice. In all cases, we used age-  
200 matched mice to minimize the variability in *Agouti* expression introduced when hair follicles are  
201 at different stages of the hair cycle. We extracted RNA from dorsal and ventral tissue as indicated  
202 above, isolated mRNA from total RNA using the NucleoTrap mRNA Kit (Clontech), and directly  
203 synthesized cDNA using qScript cDNA SuperMix (Quanta BioSciences). We performed all  
204 reactions in triplicate using PerfeCta SYBR Green FastMix (Quanta BioSciences) and calculated

205 relative expression between samples using the  $2^{-\Delta\Delta C_T}$  method (Livak & Schmittgen 2001), using  
206  $\beta$ -actin as a reference gene.

207 To measure levels of total *Agouti*, we used the primers Agouti-Exon2-F and Agouti-  
208 Exon3-R to amplify all transcripts containing the *Agouti* coding sequence. To measure levels of  
209 individual isoforms, we paired a forward primer within the noncoding exon (1C-F, 1D-F, or 1E-  
210 F, respectively) with a reverse primer in the coding region (Agouti-Exon2-R). We amplified  $\beta$ -  
211 actin using the primers  $\beta$ -actin-Pero-F and  $\beta$ -actin-Pero-R. All primer sequences were designed  
212 from the *Peromyscus maniculatus* genomic reference (Pman\_1.0, GenBank accession:  
213 GCA\_000500345.1) and can be found in Supplementary Table 1.

214  
215 Wild-caught mice: We removed a 5mm skin biopsy from the dorsum of recently sacrificed mice,  
216 preserved tissue in RNAlater, and extracted RNA as indicated above. We synthesized cDNA and  
217 performed qPCR reactions to measure total *Agouti* and  $\beta$ -actin as described for lab strains.

218  
219 *Dorsal depilation*

220 It is well established that *Agouti* expression is tightly linked to hair growth (Vrieling *et al.*  
221 1994). Contrary to newborn pups, in which hair emerges simultaneously across the body, hair  
222 follicles of adult mice are desynchronized with respect to the hair cycle (Muller-Rover & Paus  
223 2001). Thus, the quantification of *Agouti* expression in adult dorsal skin represents an average  
224 expression level across many follicles that are each at different stages in the cycle. To understand  
225 the detailed dynamics of *Agouti* isoform expression across the entire hair cycle in adults, we  
226 depilated the backs of adult wild-type and wideband mice, a procedure that resets and  
227 synchronizes the hair follicle program (Paus & Cotsarelis 1999), and compared isoform

228 expression at different time points. We anesthetized adult *P. maniculatus* wideband and wild-type  
229 mice by performing intraperitoneal injections with a cocktail of Ketamin/Xylazine (0.1mL/20g  
230 mouse wt) and depilated a small patch (~1cm<sup>2</sup>) in the dorsum using a melted beeswax/resin  
231 mixture. After the procedure, we applied topical Lidocaine for pain relief every hour for the next  
232 eight hours.

233

#### 234 *mRNA stability assays*

235 Our RACE experiment revealed that the dorsal skin in *Peromyscus* expresses three *Agouti*  
236 isoforms (1C, 1D, and 1E) simultaneously, differing only in the first, non-coding exon. To  
237 determine whether there were differences in mRNA half-life, we cloned each of the three  
238 isoforms from *P. maniculatus* wild-type into a pHAGE-CMV-eGFP-W expression vector such  
239 that the noncoding exon and *Agouti* coding sequence replaced the eGFP coding sequence. We  
240 used Lipofectamine (Life Technologies) to transfect plasmids into human embryonic kidney  
241 (HEK293) cells and 40 h after transfection halted transcription by treating cells with 10 µg/ml  
242 actinomycin D (Sigma) in DMSO. HEK cells were used in these stability assays because they  
243 provide a suitable cellular environment for transcription of mRNA encoded by expression  
244 vectors; in addition, they do not express *Agouti* endogenously, so measurements performed (see  
245 below) accurately reflect the amount of transcript produced from the transfected expression  
246 vector alone. As a control, we treated cells with an equal volume of 100% DMSO. At 0h, 2h, or  
247 4h after actinomycin treatment, we collected cells in TRIzol reagent (Invitrogen) and extracted  
248 RNA using the Direct-zol RNA Mini Kit (Zymo Research). We then performed qPCR as  
249 described above, using primers common to all constructs (i.e., located in exons 2 and 3): *Agouti*-  
250 Exon2-F and *Agouti*-Exon3-R to amplify *Agouti* and  $\beta$ -actin-Human-F and -R to amplify

251 endogenous  $\beta$ -actin. Primer sequences can be found in Supplementary Table 1. We used three  
252 replicates for each condition and time point. *Agouti* expression in actinomycin-treated cells at  
253 each time point was calculated as a percentage of *Agouti* expression in DMSO-treated cells at the  
254 same time point using the  $2^{-\Delta\Delta C_T}$  method. We then tested for significant differences between the  
255 half-lives of the isoforms by comparing the slopes of the respective trendlines, using one-way  
256 analysis of covariance (ANCOVA).

257

### 258 *Luciferase assays*

259 To establish whether the non-coding exons of the isoforms expressed in the dorsal skin of  
260 *Peromyscus* showed differences in translation, we generated luciferase reporter plasmids by  
261 cloning each of the three noncoding exons (1C, 1D, or 1E) from both *P. maniculatus* wideband  
262 and wild-type strains into a 5' UTR reporter vector (pLightSwitch\_5UTR; Switchgear Genomics)  
263 upstream of the luciferase coding sequence and downstream of the ACTB promoter. We  
264 generated mutated 1D reporter plasmids from the wild-type 1D plasmid using the Q5 Site-  
265 Directed Mutagenesis Kit (New England BioLabs). We transfected plasmids into HEK293 cells  
266 using Lipofectamine (Invitrogen), with six replicate transfections per construct. Forty-eight hours  
267 after transfection, we measured luminescence as a readout of protein production using a  
268 microplate reader (SpectraMax L). We quantified transcription from each plasmid as follows: we  
269 collected six replicates of transfected cells in TRIzol reagent (Invitrogen) and extracted RNA  
270 using the Direct-zol RNA Mini Kit (Zymo Research). We then carried out qPCR as described  
271 above using the primer pairs Luciferase-F and -R, and  $\beta$ -actin-Human-F and -R. Primer  
272 sequences can be found in Supplementary Table 1.

273

274 *Association tests*

275           Using association mapping in a variable, natural population, previous work has shown  
276 that multiple mutations in *Agouti* are statistically associated with different aspects of coat color  
277 (Linnen *et al.* 2013). These mutations may affect phenotype via measurable changes to *Agouti*  
278 expression level. To determine whether color phenotypes and *Agouti* expression co-localize to the  
279 same *Agouti* region(s), we measured *Agouti* expression (overall *Agouti* and isoform 1C) as  
280 described above in 88 mice that had been genotyped and scored for color traits as described in  
281 Linnen *et al.* (2013). To test for an association between *Agouti* genotype and expression, we  
282 performed single-SNP linear regressions in PLINK v1.07 (Purcell *et al.* 2007). To control for  
283 population structure, we genotyped individuals at 2,077 unlinked SNPs as described in Linnen *et*  
284 *al.* (2013), and used SMARTPCA to conduct a PCA, followed by TWSTATS to evaluate the  
285 statistical significance of each principle component (Patterson *et al.* 2006). We detected four  
286 significant genetic principal components and included these as covariates in the association  
287 analysis. Prior to analysis, we performed a normal-quantile transformation on the phenotype and  
288 expression data in R to ensure that our phenotypic data were normally distributed (Guan &  
289 Stephens 2011). To correct for multiple testing, we used the step-up method for controlling the  
290 False Discovery Rate, which we set to a threshold of 10% (Benjamini & Hochberg 1995).

291

292 **Results**

293 ***Peromyscus* expresses two *Agouti* isoforms not previously identified in *Mus***

294           RACE from *P. maniculatus* ventral samples revealed the presence of the ventral specific  
295 isoforms 1A, 1A', and 1A1A' (an isoform containing both the 1A and 1A' exons), and the hair-  
296 cycle specific 1C, similar to what is seen in *M. musculus* (Vrieling *et al.* 1994). However, none of

297 our clones contained sequences corresponding to exon 1B found in *M. musculus* (Vrieling *et al.*  
298 1994) (Fig. 2A and Fig. S2, supporting information). Our RACE experiment in dorsal skin  
299 revealed that, in addition to hair-cycle specific isoform 1C, *P. maniculatus* expressed two  
300 additional isoforms of *Agouti*, hereafter referred to as 1D and 1E, which had not been previously  
301 reported in *M. musculus* (Fig. 2A,B and Fig. S2, supporting information). Like the previously  
302 described *Agouti* isoforms, 1D and 1E each consist of an alternate non-coding exon (exon 1D or  
303 1E), followed by three protein-coding exons (exons 2, 3, and 4), which are shared by all *Agouti*  
304 isoforms. Both exons 1D and 1E are located downstream of exons 1A and 1C in the *Agouti* locus  
305 (Fig. 2B) and show polymorphisms between wideband and wild-type *P. maniculatus* (Fig. S2,  
306 supporting information). To confirm the absence of isoform 1B in ventral/dorsal tissue and of  
307 isoforms 1D and 1E in ventral tissue, as indicated by our RACE experiments, we carried out  
308 qPCR using isoform-specific primers in the respective tissues and did not detect any expression  
309 of these transcripts. Together, our results indicate that *P. maniculatus* expresses some, but not all,  
310 of the *Agouti* isoforms previously described in *M. musculus* (the ventral-specific 1A, 1A', 1A1A'  
311 and the hair cycle specific 1C), and also contains two novel dorsal-specific isoforms that had not  
312 been described previously (1D and 1E).

313

#### 314 **Differences in *Agouti* mRNA levels between wideband and wild-type mice are driven by** 315 **upregulation of isoform 1C**

316 Wideband and wild-type mice differ markedly in their dorsal coloration; therefore, we  
317 focused here on analyzing the isoforms present in the dorsum. Our RACE experiments  
318 demonstrated that the dorsal skin of *P. maniculatus* expresses at least three different *Agouti*  
319 transcripts (1C, 1D, and 1E) simultaneously, but it remained unknown whether all three

320 contribute to the increase in *Agouti* mRNA levels seen in wideband mice relative to wild-type  
321 ones or whether this difference is driven only by a subset. To answer this question, we used  
322 qPCR to measure the relative expression of total *Agouti* mRNA and each of its isoforms in dorsal  
323 skin of wideband and wild-type *P. maniculatus*. The expression of overall *Agouti* was  
324 approximately 22-fold higher in wideband mice than in wild-type mice ( $P = 0.0011$ , two-tailed  $t$ -  
325 test) (Fig. 3A). We then measured isoform-specific expression and found that isoform 1C was  
326 significantly higher in wideband than in wild-type mice ( $P = 0.0016$ , two-tailed  $t$ -test) (Fig. 3B).  
327 In contrast, we did not observe significant differences in mRNA levels between the two strains in  
328 expression of isoforms 1D or 1E ( $P = 0.3080$  and  $P = 0.6286$ , respectively; two-tailed  $t$ -tests)  
329 (Fig. 3B).

330 We next quantified total *Agouti* and isoform-specific expression at different time points  
331 following dorsal depilation in order to examine the dynamics of *Agouti* isoform expression  
332 during hair growth. In both strains, total *Agouti* is expressed initially at low levels, peaks at day 7  
333 after depilation, and then decreases (Fig. 3C), a pattern that mirrors the expression of *Agouti*  
334 during the first hair cycle in pups (Linnen *et al.* 2009). Total *Agouti* levels in wideband mice  
335 were higher than in wild-type mice at days 3, 7, and 9 after depilation ( $P = 0.0011$ ,  $P = 0.0228$ ,  
336 and  $P = 0.0006$ , respectively, two-tailed  $t$ -tests) (Fig. 3C). When we measured transcript-specific  
337 mRNA levels in wideband and wild-type mice, we found that the expression of isoform 1C  
338 closely matched the expression of overall *Agouti*, peaking at day 7, and differing from wild-type  
339 mice also at days 3, 7, and 9 ( $P = 0.0012$ ,  $P = 0.0109$ , and  $P = 0.0003$ , respectively, two-tailed  $t$ -  
340 tests) (Fig. 3D). This marked similarity suggests that isoform 1C levels are primarily responsible  
341 for explaining overall *Agouti* levels. In contrast, isoform 1D and 1E did not differ between

342 wideband and wild-type mice at any time points, with one exception: expression of 1E was  
343 higher in wideband than wild-type at day 5 ( $P = 0.0166$ , two-tailed  $t$ -test) (Fig. 3D).

344 To determine whether the same patterns occur in neonates, we measured isoform-specific  
345 mRNA levels at postnatal day 4, which corresponds to the stage in the first hair cycle when  
346 *Agouti* expression is highest (Linnen *et al.* 2009). Quantitative PCR confirmed that wideband  
347 mice express higher levels of total *Agouti* mRNA relative to wild-type mice ( $P = 0.0010$ , two-  
348 tailed  $t$ -test) (Fig. S3). In addition, like in adults, isoform 1C expression was significantly higher  
349 in wideband mice than in wild-type ( $P = 0.0003$ , two-tailed  $t$ -test), whereas there were no  
350 significant differences between the two strains in the expression of isoforms 1D or 1E ( $P =$   
351  $0.1575$  and  $P = 0.3231$ , respectively, two-tailed  $t$ -tests) (Fig. S3). Together, the results of our  
352 measurements of isoform-specific *Agouti* mRNA levels in adults and pups indicate that the  
353 marked increase in *Agouti* expression seen in wideband mice, relative to wild-type mice, is  
354 primarily driven by upregulation of isoform 1C.

355

### 356 ***Agouti* isoforms differ in luciferase production**

357 To investigate functional variation associated with different *Agouti* isoforms, we  
358 measured their half-lives *in vitro*. After halting transcription from a vector expressing each  
359 isoform, we used qPCR to measure mRNA levels at different time points during the transcript  
360 decay that followed and did not detect any statistically significant differences between the half-  
361 lives of the three isoforms ( $P = 0.1230$ , one-way ANCOVA) (Fig. S4). Thus, our experiment  
362 indicates that the three alternative exons simultaneously expressed in *Peromyscus* dorsal skin do  
363 not have measurable effects on the stability of the *Agouti* transcripts.



364 To determine if the isoforms differed in their regulation of translation, we next examined  
365 whether each of the alternative exons affects the amount of protein produced from a luciferase  
366 transcript. Relative to a control vector expressing a luciferase coding sequence without a 5'UTR,  
367 a vector carrying exon 1C showed a marked increase in luciferase activity ( $P = 0.0390$  [wideband  
368 sequence] and  $P = 0.0001$  [wild-type sequence], two-tailed  $t$ -tests), whereas 1D showed a marked  
369 decrease ( $P = 4.4 \times 10^{-5}$  [wideband sequence] and  $P = 0.0002$  [wild-type sequence], two-tailed  $t$ -  
370 tests). Exon 1E from wideband mice was not significantly different from the control ( $P = 0.2577$   
371 [wideband sequence], two-tailed  $t$ -test), whereas exon 1E from wild-type mice showed increased  
372 luciferase activity compared to the control ( $P = 0.0082$ , two-tailed  $t$ -test) (Fig. 4A). Importantly,  
373 we found that mRNA levels did not differ between any of the vectors ( $P = 0.3790$ , ANOVA),  
374 demonstrating that differences in translation, not transcription, are exclusively responsible for the  
375 differences in luminescence (Fig. 4B).

376 To further dissect the mechanisms underlying the differences in protein translation  
377 observed between the isoforms, we examined their sequences in more detail and found that exon  
378 1D contains start codons (ATGs) upstream of the *Agouti* start codon (three in the wild-type 1D  
379 sequence and two in the wideband sequence) (Fig. 4C and Fig. S2). Upstream start codons have  
380 been shown to decrease translation efficiency by recruiting ribosomes away from the start codon  
381 (Kozak 2002; Rosenstiel *et al.* 2007; Song *et al.* 2007; Medenbach *et al.* 2011). To determine  
382 whether this can explain the reduced translation of isoform 1D, we mutated the ATG sites to  
383 ACG in the *P. maniculatus* wild-type sequence and quantified the relative amount of luciferase  
384 produced (Fig. 4C). When we mutated and tested each ATG site individually, we found that  
385 mutating site 1 led to a significant increase in luciferase production relative to the wild-type 1D  
386 sequence ( $P = 1.268 \times 10^{-8}$ , two-tailed  $t$ -test), mutating site 2 resulted in no significant difference

387 ( $P = 0.5966$ , two-tailed  $t$ -test), and mutating site 3 led to a significant reduction ( $P = 1.6739 \times 10^{-6}$ ,  
388 two-tailed  $t$ -test) (Fig. 4C). Thus, the different ATG sites in exon 1D differ in their ability to  
389 modulate luciferase production, possibly due to differences in their surrounding sequences  
390 (Kozak 1999; 2002). When we mutated the three ATG sites simultaneously, luciferase production  
391 from the mutant transcript was significantly higher than that from the wild-type 1D transcript ( $P$   
392 = 0.000015, two-tailed  $t$ -test) and did not differ from the control ( $P = 0.0920$ , two-tailed  $t$ -test),  
393 indicating that the upstream start codons contained within exon 1D are responsible for the  
394 marked decrease in translation from this transcript. Together, these experiments demonstrate that  
395 the non-coding exons of the *Agouti* isoforms expressed in the dorsal skin of *P. maniculatus* differ  
396 in their regulation of protein translation, with non-coding exon 1C generating the highest level of  
397 luciferase, relative to the control, and non-coding exon 1D with its multiple ATG sites generating  
398 the lowest.

399

#### 400 **Genetic variation near exon 1C is associated with dorsal color and *Agouti* expression in** 401 **wild-caught mice**

402 To evaluate evidence for exon 1C's contribution to adaptive coat color variation in natural  
403 populations, we examined patterns of genotype-color associations (from Linnen *et al.* 2013) and  
404 genotype-expression associations (this study) across the 180-kb *Agouti* locus in a phenotypically  
405 variable population of *P. maniculatus*. Here, we focus on dorsal brightness because we expect  
406 that this trait (1) has a large impact on substrate matching (hence, fitness), and (2) has the  
407 potential to be strongly influenced by the hair-cycle isoform 1C due to *Agouti*'s direct impact on  
408 pigment deposition in hairs. For dorsal brightness, we previously identified a peak in association  
409 centered directly on exon 1C (Fig. 5A). Intriguingly, we also found a peak in association with

410 expression at the same location (Fig. 5B). We note, however, that these expression data were  
411 generated using an assay that detects all *Agouti* isoforms. Nevertheless, when we evaluated the  
412 correlation between genotype and isoform 1C expression using 1C-specific probes, the exon 1C  
413 SNPs remained significantly associated (SNP 109,902,  $P = 0.0026$ ; SNP 109,882,  $P = 0.0110$ ).  
414 Although the lack of polymorphic positions in exon 1C that are derived in wideband mice,  
415 relative to the *P. m. rufinus* outgroup (Linnen *et al.* 2009), suggests that the causal mutation is not  
416 in exon 1C itself, these association mapping data strongly suggest that there is a causal mutation  
417 somewhere in its immediate vicinity that simultaneously increases both expression of isoform 1C  
418 and, as a consequence, dorsal brightness.

419

#### 420 **Exon 1C has undergone strong positive selection**

421 Although we have not yet identified the causal mutation, the results of our association  
422 mapping indicate that it should be in strong linkage disequilibrium with variants located near  
423 exon 1C (Fig. 5A, B). In this way, we can use the association mapping results to define light and  
424 dark haplotypes (i.e., those that contain the causal mutation and those that do not). If the light  
425 mutation has undergone positive selection in the light Sand Hills habitat, we expect to see  
426 signatures of selection on the light, but not dark, haplotypes. To evaluate evidence of selection on  
427 light and dark haplotypes, we previously (Linnen *et al.* 2013) used the composite-likelihood  
428 method implemented in Sweepfinder (Nielsen *et al.* 2005), a method that compares, for each  
429 location, the likelihood of the data under a selective sweep to the likelihood under no sweep. The  
430 significance of the CLR test statistic is then determined via neutral simulations. In our case,  
431 neutral simulations were conducted under a demographic model estimated from genome-wide  
432 SNPs (as described in Linnen *et al.* [2013]). Figure 5C depicts the resulting likelihood surfaces

433 and significance thresholds for light and dark haplotypes across a ~20-kb window centered on  
434 exon 1C (Fig. 5A, 5B). This analysis indicates strong evidence of selection on the light, but not  
435 dark, haplotypes in this region of the *Agouti* locus. Specifically, within this window, the light  
436 haplotypes have a 3.6-fold increase in the number of sites rejecting neutrality and a 5.0-fold  
437 increase in the average selection coefficient. Together with the results of our association  
438 mapping, these analyses indicate that a mutation(s) in the immediate vicinity of exon 1C  
439 contributes to dorsal color and is currently undergoing strong positive selection ( $s = 0.14$ ; Linnen  
440 *et al.* [2013]).

441

#### 442 **Evolutionary convergence of isoform regulation in *Peromyscus***

443 Our results show that *Agouti* isoform 1C is specifically upregulated in the light-colored *P.*  
444 *maniculatus* wideband mice from the Nebraska Sand Hills relative to the dark-colored ancestral  
445 population. We next investigated whether similar regulatory mechanisms are observed in another  
446 population of *Peromyscus* that independently underwent selection for light pigmentation. We  
447 examined patterns of isoform expression in light-colored Santa Rosa Island beach mice (*P. p.*  
448 *leucocephalus*) and compared them to dark mainland *P. p. subgriseus* (Fig. 1). Quantitative PCR  
449 revealed that expression of *Agouti* was approximately three-fold higher in beach mice compared  
450 to mainland mice ( $P = 0.0142$ , two-tailed *t*-test; Fig. 6A). Measurements of *Agouti* isoform-  
451 specific mRNA levels revealed that there were no significant differences in the expression of  
452 isoform 1D or 1E between beach mice and mainland mice ( $P = 0.5352$  and  $P = 0.3826$ ,  
453 respectively, two-tailed *t*-test; Fig. 6B). In contrast, we found that isoform 1C was significantly  
454 upregulated in beach mice compared to mainland mice ( $P = 0.0011$ , two-tailed *t*-test; Fig. 6B).  
455 Together, our measurements of mRNA levels demonstrate that the increase in *Agouti* expression

456 seen in beach mice, relative to mainland mice, is produced primarily by a specific upregulation of  
457 isoform 1C, a pattern that matches what we observed in *P. maniculatus* (Fig. 3A).

458

## 459 **Discussion**

460 The *Agouti* locus, which contains multiple independently regulated transcription start sites  
461 and has been linked to pigment variation in *Peromyscus* (Steiner *et al.* 2007; Mullen & Hoekstra  
462 2008; Linnen *et al.* 2009; 2013) and other mammals (Rieder *et al.* 2001; Schmutz & Berryere  
463 2007; Seo *et al.* 2007), represents an ideal study system to understand the importance of  
464 alternative transcript processing in adaptation to new environments. While different isoforms  
465 have been well studied in *Mus musculus*, in *Peromyscus* we both identify new dorsally expressed  
466 isoforms (1D and 1E) as well as the lack of expression of 1B across the body. These differences  
467 are consistent with genome-wide surveys of isoform variation, which find rapid evolution of  
468 isoform usage between species (Barbosa-Morais *et al.* 2012; Merkin *et al.* 2012).

469 In this study, we also find that although the dorsal skin of *Peromyscus* mice expresses  
470 three different *Agouti* isoforms simultaneously, differing only in their first non-coding exon (1C,  
471 1D, and 1E), the marked differences in overall *Agouti* expression seen between *P. maniculatus*  
472 strains (wideband vs. wild-type) and between *P. polionotus* subspecies (*P. p. leucocephalus* vs.  
473 *P. p. subgriseus*) are exclusively driven by one of the isoforms (1C). Thus, populations of *P.*  
474 *maniculatus* and *P. polionotus* experiencing selection pressures for light dorsal pigmentation  
475 have independently converged not only on the same gene, but also on the specific upregulation of  
476 the same isoform. One explanation for this result is that exon 1C has inherent sequence properties  
477 that result in large amount of protein (relative to other *Agouti* isoforms), indicating that such  
478 convergence in isoform upregulation may be driven by selection for the molecular mechanism

479 promoting the highest amount of *Agouti* protein production. In support of this, we find that in a  
480 admixed population in the Sand Hills, dorsal color and *Agouti* gene expression is significantly  
481 associated with genetic variation around exon 1C and that this region shows a pattern of strong  
482 selection.

483         Given the patterns of phenotypic and gene expression association as well as the signatures  
484 of selection we have reported here and elsewhere (Linnen *et al.* 2013), it is likely that at least one  
485 causal polymorphism is located somewhere in the close vicinity of exon 1C (Fig. 5), as this  
486 population has low levels of linkage disequilibrium at the *Agouti* locus (Linnen *et al.* 2013). An  
487 important goal of future work is to characterize and functionally test the variants in this region,  
488 including indels and low-coverage SNPs that may have been absent in the capture-based  
489 genotype data. In the case of *P. polionotus* beach mice, despite the fact that selection on  
490 pigmentation is strong ( $s = 0.5$ ; Vignieri *et al.* 2010) and *Agouti* is known to be a major  
491 contributor to pigment differences (Steiner *et al.* 2007; Mullen & Hoekstra 2008), any inferences  
492 of positive selection for regions in or around exon 1C are confounded by the unique demographic  
493 history of this species, which has experienced severe population bottlenecks associated with  
494 colonization events from the mainland to novel habitats in the Gulf Coast (Thornton *et al.* 2007;  
495 Domingues *et al.* 2012; Poh *et al.* 2014). Thus, it is not possible to evaluate with certainty  
496 whether specific regions in the *Agouti* locus show signatures of similar selective pressures  
497 between *P. maniculatus* and *P. polionotus*.

498         We find that the dorsal skin of *Peromyscus* expresses two isoforms that are not found in  
499 *Mus* or in other species (1D and 1E). However, it is unlikely that they have played a major role in  
500 the evolution of light coloration in *Peromyscus* because their expression patterns do not differ  
501 between the light and dark-colored strains examined here and do not follow the pulse of *Agouti*

502 expression that occurs during hair growth (Vrieling *et al.* 1994). From a functional perspective,  
503 isoform 1D contains sequences that cause a marked repression of protein translation, so it is not  
504 surprising that this particular exon does not constitute a target for selection, and does not show  
505 differences in expression between *P. maniculatus* strains or *P. polionotus* subspecies. In the case  
506 of isoform 1E, our functional experiments suggest that the sequence of exon 1E found in wild-  
507 type *P. maniculatus* increases protein translation, whereas the exon 1E sequence found in  
508 wideband *P. maniculatus* does not impact translation. The two strains' sequences differ only at  
509 the end of the exon, where wild-type *P. maniculatus* has a six base pair deletion (Fig S2,  
510 supporting information). Importantly, however, the exon 1E sequence found in an outgroup to the  
511 two strains, *P. maniculatus rufinus*, is identical to that found in wideband *P. maniculatus*,  
512 indicating that the deletion found in the wild-type 1E sequence is likely derived and arose after  
513 the split between wild-type and wideband populations. Thus, in the common ancestor of wild-  
514 type and wideband mice, exon 1C—and not exon 1E—would have been the only non-coding  
515 exon that promoted increased protein production. The driving forces underlying the evolution and  
516 maintenance of isoforms 1D and 1E in *Peromyscus* populations are yet unknown.

517         Since *Agouti*'s function is primarily linked to regulating pigment-type switching in  
518 melanocytes, changes affecting this gene are less likely to have negative pleiotropic  
519 consequences and thus, selection pressures for eliminating particular transcripts from populations  
520 may be relaxed. Alternatively, isoforms 1D and 1E could be playing a role in other aspects of  
521 *Agouti*'s function independent of its interaction with melanocytes that was not uncovered by our  
522 experiments, such as secretion and/or transport from the dermal papillae. Examining  
523 presence/absence and expression patterns of these isoforms in additional *Peromyscus* species and  
524 populations may shed light on some of these possibilities.

525           The findings presented here also bear on the molecular basis of convergent evolution. It  
526 has long been a topic of contention in evolutionary biology whether similar phenotypes that  
527 evolve independently tend to be generated by similar or different molecular changes (e.g., Stern  
528 2013; Manceau *et al.* 2010; Rosenblum *et al.* 2010). Some studies of convergent phenotypes have  
529 found that they occur through independent mutations at different loci (e.g., Steiner *et al.* 2009;  
530 Weng *et al.* 2010; Kowalko *et al.* 2013), while others have found that similar evolutionary  
531 pressures on two populations can result in changes at the same gene (e.g., Woods *et al.* 2006),  
532 and in some cases, even the same amino acid substitutions (Zhen *et al.* 2012; van Ditmarsch *et al.*  
533 2013). In the case of convergent pigmentation phenotypes in *Peromyscus*, not only is the same  
534 locus targeted, but the same pattern of isoform regulatory change has occurred—highlighting the  
535 various ways in which convergent evolution can occur at the molecular level.

536           Our results add an additional layer to the known mechanisms by which *Agouti* can play a  
537 role in the evolution of pigmentation phenotypes in *Peromyscus*. *Cis*-regulatory changes in  
538 *Agouti* are known to contribute to both the wideband phenotype in *P. maniculatus* (Linnen *et al.*  
539 2009; 2013) and the beach mouse phenotype in *P. polionotus* (Steiner *et al.* 2007; Manceau *et al.*  
540 2011). In addition, an amino acid change in the *Agouti* coding sequence of *P. maniculatus*  
541 wideband mice is strongly associated with light phenotypes and shows strong signatures of  
542 selection (Linnen *et al.* 2009; 2013). Here, we find that in addition to these changes, differences  
543 in *Agouti* isoform regulation have also been involved in the evolution of adaptive pigmentation  
544 variation in this genus. It is clear that alternative transcript processing provides a virtually  
545 limitless substrate for the generation of functional and structural transcriptomic and proteomic  
546 diversity, and genomic studies analyzing rates of alternative splicing and alternative promoter  
547 usage have revealed the importance of this mechanism in originating diversity at large taxonomic



548 scales (Barbosa-Morais *et al.* 2012; Merkin *et al.* 2012). Our study, by providing an example that  
549 links alternative mRNA processing with adaptation to a known selective pressure in different  
550 subspecies between sister species, highlights the importance of this mechanism as a driver of  
551 diversification and adaptation at smaller taxonomic scales as well.

552

553

## 554 **References**

- 555 Ahlbrandt TS, Fryberger SG (1980) Eolian deposits in the Nebraska Sand hills. *US Geological*  
556 *Survey Professional Paper*, **1120A**, 1–24.
- 557 Baek D, Davis C, Ewing B, Gordon D, Green P (2007) Characterization and predictive discovery  
558 of evolutionarily conserved mammalian alternative promoters. *Genome Research*, **17**, 145–  
559 155.
- 560 Barbosa-Morais NL, Irimia M, Pan Q *et al.* (2012) The evolutionary landscape of alternative  
561 splicing in vertebrate species. *Science*, **338**, 1587–1593.
- 562 Benjamini Y, Hochberg Y (1995) Controlling the false discovery rate: A practical and powerful  
563 approach to multiple testing. *Journal of the Royal Statistical Society Series B*, **57**, 289–300.
- 564 Bennet D, Lamoreux ML (2003) The color loci of mice – a genetic century. *Pigment Cell*  
565 *Research*, **16**, 333–344.
- 566 Blencowe BJ (2006) Alternative splicing: new insights from global analyses. *Cell*, **126**, 37–47.
- 567 Campbell KM (1985) *Campbell: Geology of Sarasota County, Florida*. Florida Geological  
568 Survey Open File.
- 569 Carroll SB (2005) Evolution at two levels: On genes and form. *PLoS Biology*, **3**, e245.
- 570 Dice LR (1940) Ecologic and genetic variability within species of *Peromyscus*. *American*  
571 *Naturalist*, **74**, 212–221.
- 572 Dice LR (1941) Variation of the Deer-mouse (*Peromyscus maniculatus*) on the Sand hills of  
573 Nebraska and adjacent areas. *Contributions from the Laboratory of Vertebrate Biology*, **15**,  
574 1-19.
- 575 Domingues VS, Poh Y-P, Peterson BK *et al.* (2012) Evidence of adaptation from ancestral  
576 variation in young populations of beach mice. *Evolution*, **66**, 3209–3223.
- 577 Golley FB, Morgan EL, Carmon JL (1966) Progression of molt in *Peromyscus polionotus*.  
578 *Journal of Mammalogy*, **47**, 145–148.
- 579 Guan Y, Stephens M (2011) Bayesian variable selection regression for genome-wide association  
580 studies and other large-scale problems. *The Annals of Applied Statistics*, **5**, 1780–1815.
- 581 Haldane J (1948) The theory of a cline. *Journal of Genetics*, **48**, 277–284.
- 582 Hoekstra HE (2006) Genetics, development and evolution of adaptive pigmentation in  
583 vertebrates. *Heredity*, **97**, 222–234.
- 584 Hoekstra HE, Coyne JA (2007) The locus of evolution: Evo devo and the genetics of adaptation.  
585 *Evolution*, **61**, 995–1016.

- 586 Hoekstra HE, Hirschmann RJ, Bunday RA, Insel PA, Crossland JP (2006) A single amino acid  
587 mutation contributes to adaptive beach mouse color pattern. *Science*, **313**, 101–104.
- 588 Jackson I (1994) Molecular and developmental genetics of mouse coat color. *Annual Review of*  
589 *Genetics*, **28**, 189–217.
- 590 Kim E, Goren A, Ast G (2008) Alternative splicing: current perspectives. *BioEssays*, **30**, 38–47.
- 591 Kingsley EP, Manceau M, Wiley CD, Hoekstra HE (2009) Melanism in *Peromyscus* is caused by  
592 independent mutations in *Agouti*. *PLoS One*, **4**, e6435.
- 593 Kowalko JE, Rohner N, Linden TA *et al.* (2013) Convergence in feeding posture occurs through  
594 different genetic loci in independently evolved cave populations of *Astyanax mexicanus*.  
595 *Proceedings of the National Academy of Sciences*, **110**, 16933–16938.
- 596 Kozak M (1999) Initiation of translation in prokaryotes and eukaryotes. *Gene*, **234**, 187–208.
- 597 Kozak M (2002) Pushing the limits of the scanning mechanism for initiation of translation. *Gene*,  
598 **299**, 1–34.
- 599 Landry J-R, Mager DL, Wilhelm BT (2003) Complex controls: the role of alternative promoters  
600 in mammalian genomes. *Trends in Genetics*, **19**, 640–648.
- 601 Linnen CR, Kingsley EP, Jensen JD, Hoekstra HE (2009) On the origin and spread of an adaptive  
602 allele in deer mice. *Science*, **325**, 1095–1098.
- 603 Linnen CR, Poh Y-P, Peterson BK *et al.* (2013) Adaptive evolution of multiple traits through  
604 multiple mutations at a single gene. *Science*, **339**, 1312–1316.
- 605 Livak KJ, Schmittgen TD (2001) Analysis of relative gene expression data using real-time  
606 quantitative PCR and the 2(-Delta Delta C(T)) Method. *Methods*, **25**, 402–408.
- 607 Loope DB, Swinehart JB (2000) Thinking like a dune field: Geologic history in the Nebraska  
608 Sand Hills. *Great Plains Research*, **10**, 5–35.
- 609 Manceau M, Domingues VS, Linnen CR, Rosenblum EB, Hoekstra HE (2010) Convergence in  
610 pigmentation at multiple levels: mutations, genes and function. *Philosophical Transactions of*  
611 *the Royal Society*, **365**, 2439–2450.
- 612 Manceau M, Domingues VS, Mallarino R, Hoekstra HE (2011) The developmental role of *Agouti*  
613 in color pattern evolution. *Science*, **331**, 1062–1065.
- 614 Medenbach J, Seiler M, Hentze MW (2011) Translational control via protein-regulated upstream  
615 open reading frames. *Cell*, **145**, 902–913.
- 616 Merkin J, Russell C, Chen P, Burge CB (2012) Evolutionary dynamics of gene and isoform  
617 regulation in mammalian tissues. *Science*, **338**, 1593–1599.
- 618 Mullen LM, Hoekstra HE (2008) Natural selection along an environmental gradient: a classic  
619 cline in mouse pigmentation. *Evolution*, **62**, 1555–1570.
- 620 Muller-Rover S, Paus R (2001) A comprehensive guide for the accurate classification of murine  
621 hair follicles in distinct hair cycle stages. *Journal of Investigative Dermatology*, **117**, 3–15.
- 622 Nielsen R, Williamson S, Kim Y *et al.* (2005) Genomic scans for selective sweeps using SNP  
623 data. *Genome Research*, **15**, 1566–1575.
- 624 Patterson N, Price AL, Reich D (2006) Population structure and eigenanalysis. *PLoS Genetics*, **2**,  
625 e190–2093.
- 626 Paus R, Cotsarelis G (1999) The biology of hair follicles. *New England Journal of Medicine*,  
627 **341**, 491–497.
- 628 Poh, YP, Domingues VS, Hoekstra HE, Jensen JD (2014) On the prospect of identifying adaptive  
629 loci in recently bottlenecked populations. *PLoS One* **9**, e110579.
- 630 Purcell S, Neale B, Todd-Brown K, Thomas L (2007) PLINK: a tool set for whole-genome

- 631 association and population-based linkage analyses. *The American Journal of Human*  
632 *Genetics*, **81**, 559–575.
- 633 Rieder S, Taourit S, Mariat D, Langlois B, Guérin G (2001) Mutations in the agouti (ASIP), the  
634 extension (MC1R), and the brown (TYRP1) loci and their association to coat color  
635 phenotypes in horses (*Equus caballus*). *Mammalian Genome*, **12**, 450–455.
- 636 Rosenblum EB, Rompler H, Schoneberg T, Hoekstra HE (2010) Molecular and functional basis  
637 of phenotypic convergence in white lizards at White Sands. *Proceedings of the National*  
638 *Academy of Sciences*, **107**, 2113–2117.
- 639 Rosenstiel P, Huse K, Franke A *et al.* (2007) Functional characterization of two novel 5'  
640 untranslated exons reveals a complex regulation of NOD2 protein expression. *BMC*  
641 *Genomics*, **8**, 472–480.
- 642 Schmutz SM, Berryere TG (2007) Genes affecting coat colour and pattern in domestic dogs: a  
643 review. *Animal Genetics*, **38**, 539–549.
- 644 Seo K, Mohanty TR, Choi T, Hwang I (2007) Biology of epidermal and hair pigmentation in  
645 cattle: a mini-review. *Veterinary Dermatology*, **18**, 392–400.
- 646 Shabalina SA, Ogurtsov AY, Spiridonov NA, Koonin EV (2014) Evolution at protein ends:  
647 major contribution of alternative transcription initiation and termination to the transcriptome  
648 and proteome diversity in mammals. *Nucleic Acids Research*, **42**, 7132–7144.
- 649 Song KY, Hwang CK, Kim CS *et al.* (2007) Translational repression of mouse mu opioid  
650 receptor expression via leaky scanning. *Nucleic Acids Research*, **35**, 1501–1513.
- 651 Stapor FW Jr, Mathews TD (1991) Barrier-island progradation and Holocene sea-level history in  
652 southwest Florida. *Journal of Coastal Research*, **7**, 815–838.
- 653 Steiner CC, Weber JN, Hoekstra HE (2007) Adaptive variation in beach mice produced by two  
654 interacting pigmentation genes. *PLoS Biology*, **5**, e219.
- 655 Stern DL (2013) The genetic causes of convergent evolution. *Nature Reviews Genetics*, **14**, 751–  
656 764.
- 657 Stern DL, Orgogozo V (2008) The loci of evolution: how predictable is genetic evolution?  
658 *Evolution*, **62**, 2155–2177.
- 659 Thornton KR, Jensen JD, Becquet C, Andolfatto P (2007) Progress and prospects in mapping  
660 recent selection in the genome. *Heredity*, **98**, 340–348.
- 661 van Ditmarsch D, Boyle KE, Sakhtah H *et al.* (2013) Convergent evolution of hyperswarming  
662 leads to impaired biofilm formation in pathogenic bacteria. *Cell Reports*, **4**, 697–708.
- 663 Vignieri SN, Larson JG, Hoekstra HE (2010) The selective advantage of crypsis in mice.  
664 *Evolution*, **64**, 2153–2158.
- 665 Vrieling H, Duhl DM, Millar SE, Miller KA, Barsh GS (1994) Differences in dorsal and ventral  
666 pigmentation result from regional expression of the mouse *agouti* gene. *Proceedings of the*  
667 *National Academy of Sciences*, **91**, 5667–5671.
- 668 Weng J-K, Akiyama T, Bonawitz ND *et al.* (2010) Convergent evolution of syringyl lignin  
669 biosynthesis via distinct pathways in the lycophyte *Selaginella* and flowering plants. *The*  
670 *Plant Cell*, **22**, 1033–1045.
- 671 Woods R, Schneider D, Winkworth CL, Riley MA, Lenski RE (2006) Tests of parallel molecular  
672 evolution in a long-term experiment with *Escherichia coli*. *Proceedings of the National*  
673 *Academy of Sciences*, **103**, 9107–9112.
- 674 Zhen Y, Aardema ML, Medina EM, Schumer M, Andolfatto P (2012) Parallel molecular  
675 evolution in an herbivore community. *Science*, **337**, 1634–1637.

676  
677

678 **Data accessibility**

679 An Excel file containing the measurements for coat color, soil reflectance, and all gene  
680 expression values will be provided prior to publication.

681

682 **Acknowledgements**

683 We thank Judy Chupasko and Mark Omura for help with specimen preparation, Catalina  
684 Perdomo for technical assistance with luciferase assays, and Nikki Hughes for providing  
685 logistical support. RM and the molecular work was supported by a Swiss National Science  
686 Foundation grant to HEH. TAL was supported by a Herchel Smith-Harvard Undergraduate  
687 Research Fellowship; CRL was supported by a Ruth Kirschstein National Research Service  
688 Award from NIH; HEH is an Investigator of the Howard Hughes Medical Institute. This work  
689 was supported by a grant from the Swiss National Science Foundation.

690

691 **Author contributions**

692 RM, CRL, and HEH conceived the project and designed the experiments. RM, TAL, and CRL  
693 performed experiments and analyzed data. All authors wrote the paper.

694 **Figure legends**

695 **Figure 1. Environmental and phenotypic differences between ancestral and derived**  
696 **habitats and mice in Nebraska and Florida.** (A) Photographs of wild-type *Peromyscus*  
697 *maniculatus bairdii* (WT), wideband *P. m. nebrascensis* (WB), *P. polionotus subgriseus*  
698 mainland, and *P. p. leucocephalus* beach mice (top), typical habitats (bottom), and soil (bottom  
699 inset). (B) Dorsal brightness (total dorsal reflectance) measured in mice from ancestral (black  
700 circles) and derived (white circles) habitats. (C) Reflectance of soil samples from ancestral (black  
701 circles) and derived (white circles) habitats. Soil samples are from Cherry County, Sparks,  
702 Nebraska vs. Cherry County, Schlagel, Nebraska; Jackson County, Graceville, Florida vs.  
703 Okaloosa County, Santa Rosa Island (SRI) Florida. \*  $P < 0.05$ , \*\* $P < 0.01$ , \*\*\* $P < 0.001$ , two-  
704 tailed  $t$ -tests;  $n = 5$  (mice) and  $n = 5$  (soil). Reflectance values were normalized by subtracting the  
705 darkest value and dividing by the lightest minus the darkest.

706  
707  
708 **Figure 2. Characterization of *Agouti* isoform expression in *P. maniculatus* using 5' RACE.**  
709 (A) *Agouti* isoforms expressed in the ventrum and dorsum of *M. musculus* pups (strain A<sup>W</sup>) and  
710 wild-type *P. maniculatus*. For *P. maniculatus*, all isoforms were found in both adults and pups by  
711 RACE and/or qPCR. (B) Map of the *Agouti* locus in *M. musculus* (above) and *P. maniculatus*  
712 (below). Colors in (A) and (B) represent ventral specific non-coding exons (blue), hair cycle-  
713 specific non-coding exons (red), and the novel non-coding exons (green) reported here. Coding  
714 exons (black) are common to all isoforms.

715  
716  
717 **Figure 3. Differential expression of *Agouti* isoforms between wideband and wild-type mice.**  
718 (A) qPCR in adults shows that the overall expression of *Agouti* mRNA in wideband mice (light  
719 circles) is higher than wild-type mice (dark circles). (B) Isoform-specific mRNA levels of  
720 isoform 1C are higher in wideband than wild-type mice, but no significant differences in 1D or  
721 1E expression. (C) qPCR measurements of overall *Agouti* mRNA levels at different time points  
722 after hair removal show that wideband and wild-type mice differ in the expression of total *Agouti*  
723 at days 3, 7, and 9 after depilation. (D) Isoform specific measurements show that isoform 1C  
724 differs between the two strains at days 3, 7, and 9, whereas isoforms 1D and 1E do not differ  
725 between the two strains, with the exception of 1E, which differs at day 5. \*  $P < 0.05$ , \*\* $P < 0.01$ ,  
726 \*\*\* $P < 0.001$ , two-tailed  $t$ -tests;  $n = 4$  (for each strain in (A) and (B)) and  $n = 3$  (for each strain  
727 and time point in (C) and (D)); red bars indicate the mean.

728  
729  
730 **Figure 4. *Agouti* isoforms differ in luciferase production.** (A) Relative luciferase levels  
731 produced by transcripts carrying the three different 5' UTRs expressed in *P. maniculatus*. \*  $P <$   
732  $0.05$ , \*\* $P < 0.01$ , \*\*\* $P < 0.001$ , two tailed  $t$ -tests;  $n = 6$  per construct. (B) mRNA levels of  
733 luciferase did not differ between the constructs demonstrating that differences seen in (A) occur  
734 at the posttranscriptional level; ANOVA,  $n = 3$ . Only results from wild-type sequences are  
735 shown. (C) (Above) The sequence of exon 1D (black font) in wild-type *P. maniculatus*.  
736 Upstream start codons are boxed in red, the beginning of exon 2 is in green font, and the  
737 functional ATG is boxed in blue. (Below) Quantification of relative luciferase levels from



738 transcripts carrying the *P. maniculatus* wild-type exon 1D and those carrying a version of exon  
739 1D where each upstream ATG site has been mutated to ACG, relative to a control lacking a 5'  
740 UTR. \*  $P < 0.05$ , \*\* $P < 0.01$ , \*\*\* $P < 0.001$ , two tailed *t*-tests;  $n = 6$  per construct; red bars  
741 indicate the mean. In all cases, luciferase levels are normalized relative to background levels.  
742

743  
744 **Figure 5. Genetic variation near exon 1C is associated with dorsal color, *Agouti* expression,**  
745 **and signatures of selection in a natural population of *P. maniculatus*.** (A, B) Strength of  
746 statistical association ( $-\log$  p-value) between dorsal brightness (A) and *Agouti* expression (B) for  
747 466 SNPs (circles) tested in  $n = 91$  (A) or 88 (B) mice. SNPs significant after a 10% FDR  
748 correction are indicated in red. The gray bar highlights the location of exon 1C, and the dashed  
749 lines indicate a 20-kb region centered on this exon. Color (A) and expression (B) both have  
750 multi-SNP peaks of association centered on exon 1C. (C) Strength of evidence favoring a  
751 selection model over a neutral model (likelihood ratios) as a function of location in *Agouti*.  
752 Likelihood surfaces are shown for light (red) and dark (black) haplotypes, as determined by the  
753 strongest associated SNP in (A). Dashed lines indicate significance thresholds, determined via  
754 neutral simulations, for light (red) and dark (black) haplotypes. Data for (A) and (C) are from  
755 Linnen *et al.* (2013). *Agouti* positions are defined relative to the *P. maniculatus* BAC clone  
756 reported in Kingsley *et al.* (2009).  
757

758  
759 **Figure 6. Differential expression of *Agouti* isoforms in *P. polionotus* mainland and beach**  
760 **mice.** (A) Beach mice (light circles) have higher expression of total *Agouti* than mainland mice  
761 (dark circles), as determined by qPCR. (B) Expression of isoform 1C is higher in beach mice  
762 (light circles) compared to mainland mice (dark circles), whereas there were no significant  
763 differences in 1D or 1E expression. \*  $P < 0.05$ , \*\* $P < 0.01$ , \*\*\* $P < 0.001$ , two-tailed *t*-tests;  $n =$   
764 4; red bars indicate the mean.  
765

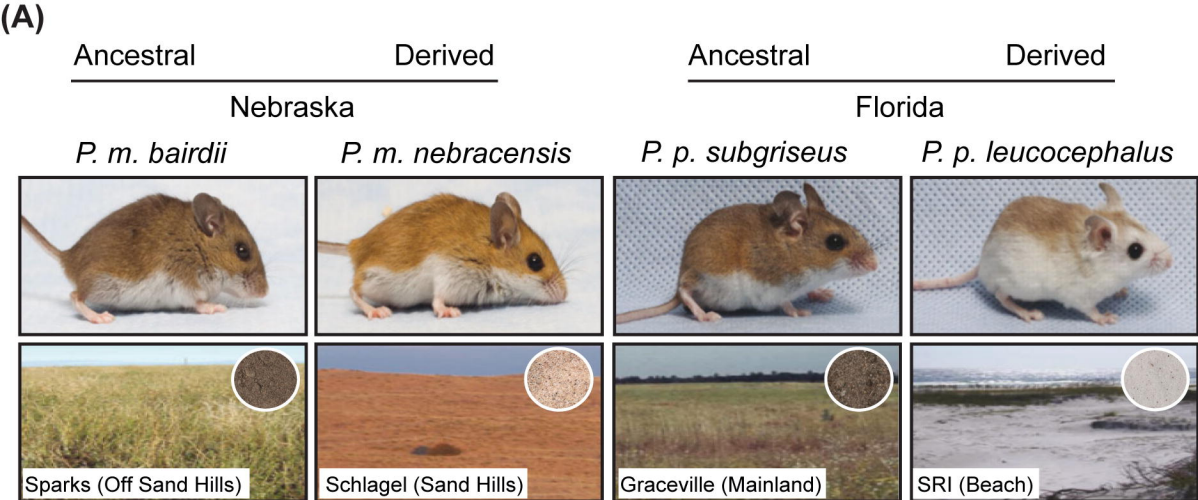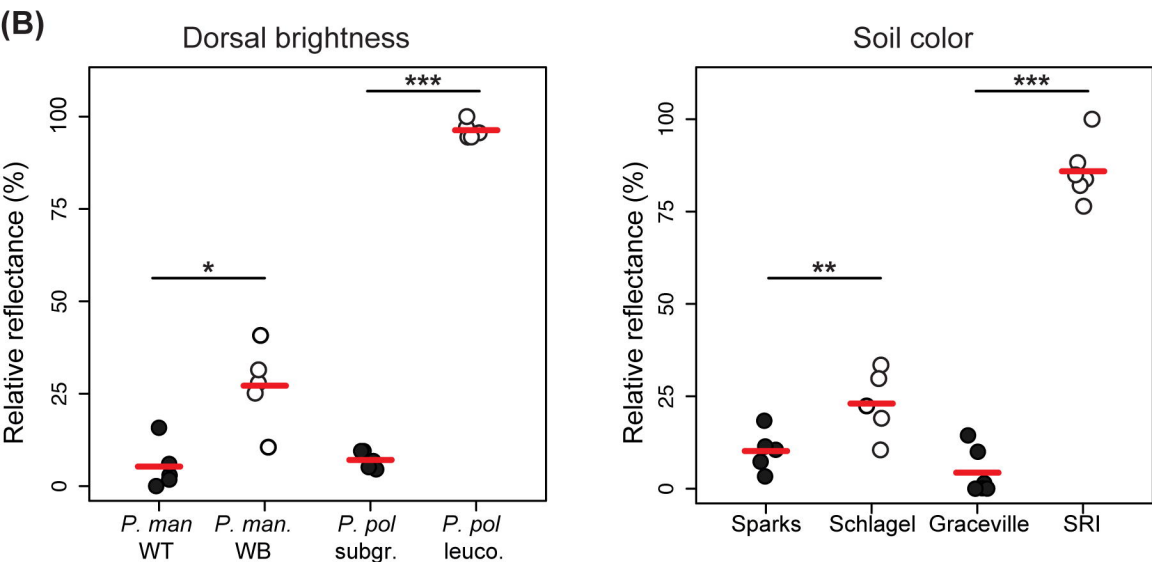

Figure 1

**(A)***M. musculus* (*A<sup>W</sup>*)    *P. maniculatus*

Dorsum

1B, 1C, 1B1C

1C, 1D, 1E

Venterum

1A, 1A', 1A1A'  
1B, 1C, 1B1C1A, 1A', 1A1A'  
1C**(B)**

ventral-specific

hair-cycle specific

coding exons

*M. musculus*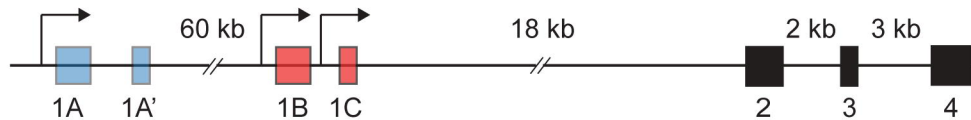*P. maniculatus*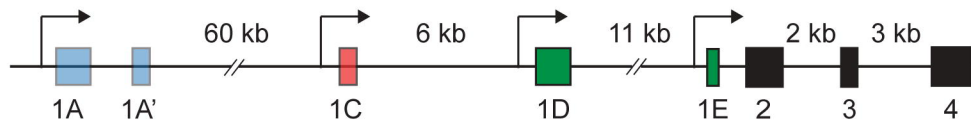

Figure 2



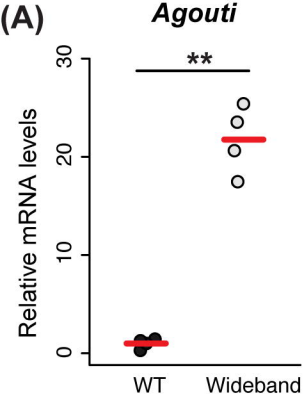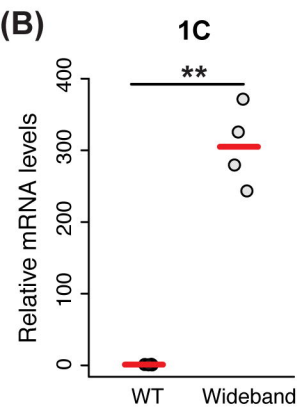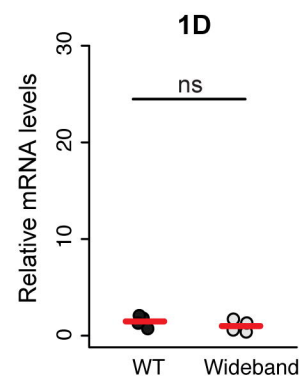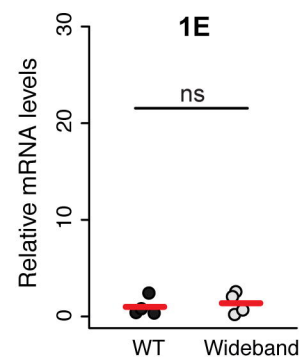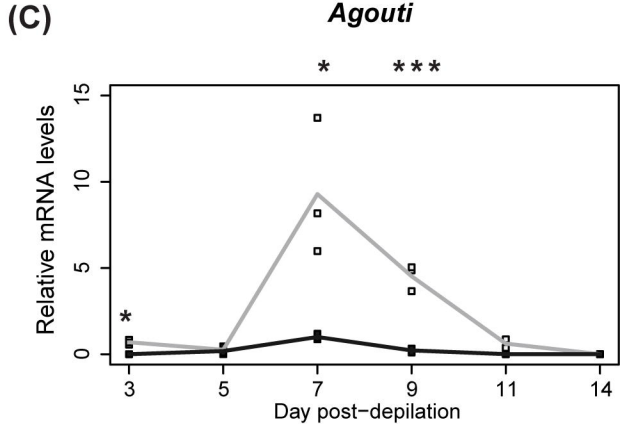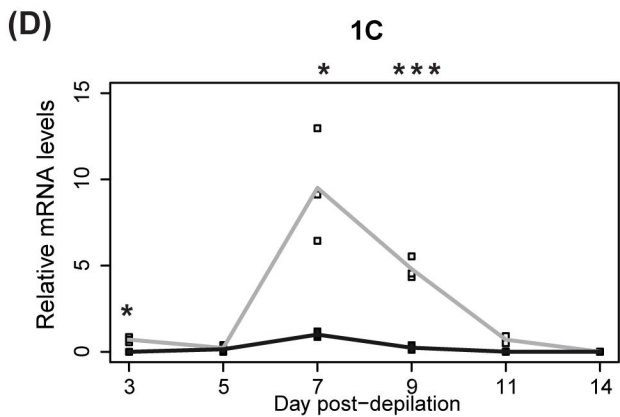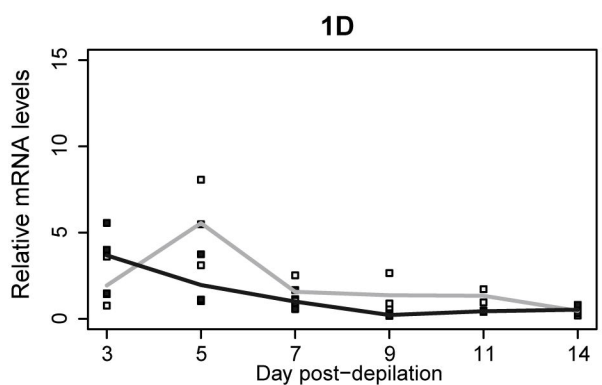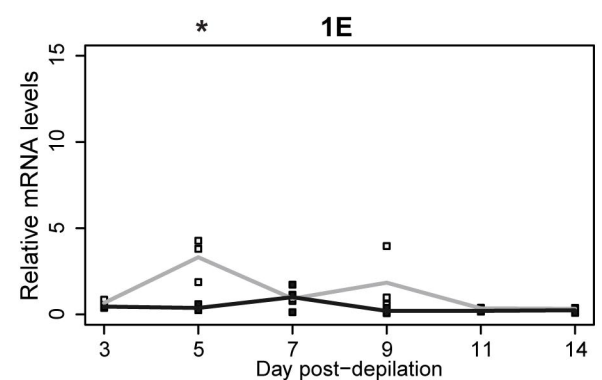

Figure 3

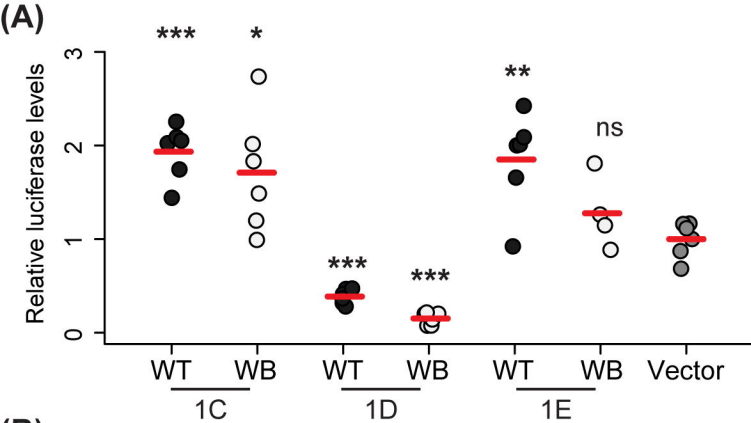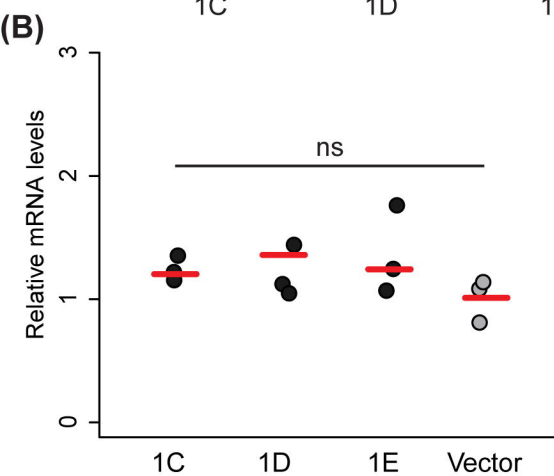

**(C) 1D WT**

ATA **ATG** GCCTCGCGCCTCGCCTCCCAGGCGCTAGA ACTGC **ATG** CA  
 GGTGCGCAGCATCACTCCTCAGGCCGGTCTTCCTGCTTCCCGTCC  
 ACTCCTGGGAAAGTGCAGAGCTAGGTCTGGG **ATG** ACTTCTTCCAC  
 GGCCGTA CT TCTGCAGCTTTTCAGG **ATG**

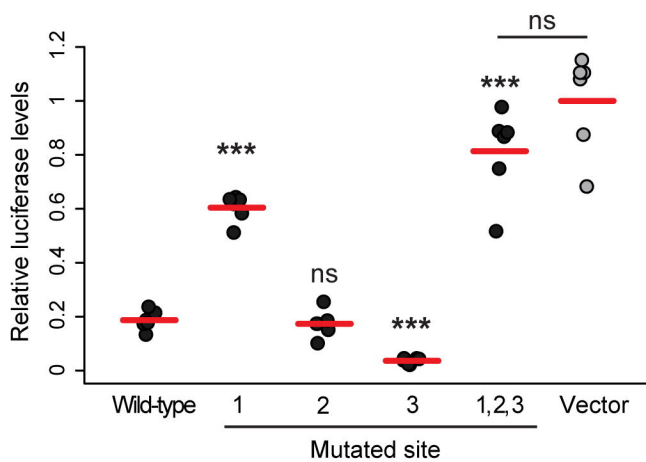

Figure 4

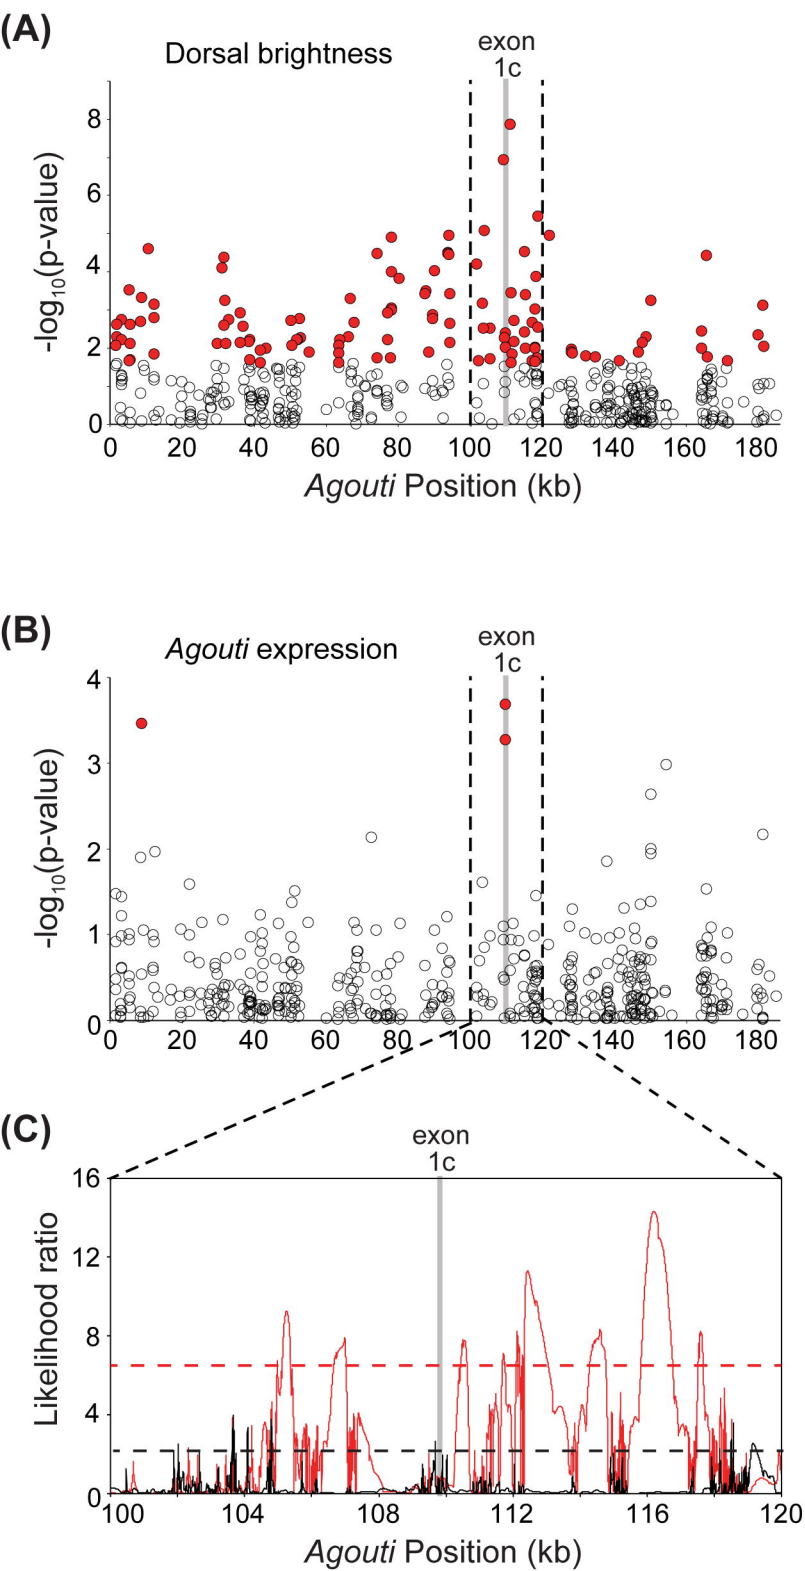

Figure 5

**(A)**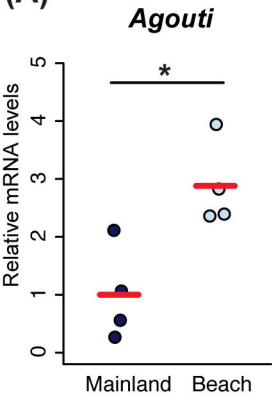**(B)**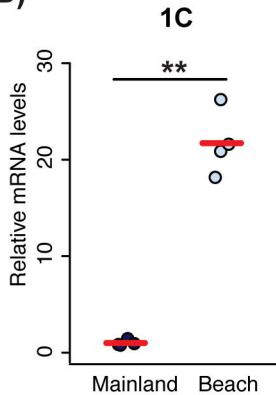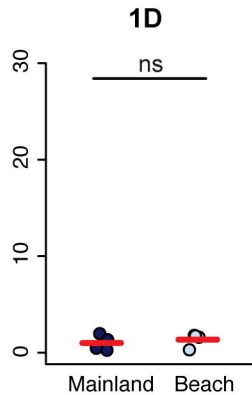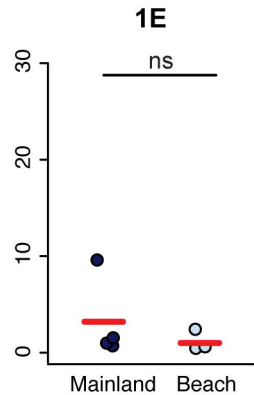**Figure 6**
